# Supplementary material for: Ontogenetic Variation in Macrocyclic and Hemicyclic Poplar Rust Fungi
Source: MDPI journal article supplement (doi:10.3390/ijms232113062), 2022-10-27

## Supplementary

**Table S1. Open reading frame of *STE3.3* and *STE3.4* genes in *Melampsora* spp.**

| Name                  | ORF length | Amino acid number | GenBank ID |
|-----------------------|------------|-------------------|------------|
| <i>MlpSTE3.3-URE</i>  | 1158       | 385               | MW363516   |
| <i>MlpSTE3.3-TEL</i>  | 1158       | 385               | MW927156   |
| <i>MmedSTE3.3-URE</i> | 1158       | 385               | MW927144   |
| <i>MmedSTE3.3-TEL</i> | 1161       | 386               | MW927159   |
| <i>MpruSTE3.3-URE</i> | 1152       | 383               | MW927145   |
| <i>MpruSTE3.3-TEL</i> | 1152       | 383               | MW927157   |
| <i>MlpSTE3.4-URE</i>  | 1245       | 414               | MW363515   |
| <i>MlpSTE3.4-TEL</i>  | 1245       | 414               | MW927160   |
| <i>MmedSTE3.4-URE</i> | 1245       | 414               | MW927147   |
| <i>MmedSTE3.4-TEL</i> | 1245       | 414               | MW927163   |
| <i>MpruSTE3.4-URE</i> | 1212       | 403               | MW927149   |
| <i>MpruSTE3.4-TEL</i> | 1212       | 403               | MW927161   |
| <i>MmagSTE3.4-URE</i> | 1212       | 403               | MW927148   |
| <i>MmagSTE3.4-TEL</i> | 1212       | 403               | MW927162   |

**Table S2. Predicted of physical and chemical properties of STE3.3 and STE3.4 protein in *Melampsora* spp.**

| Name                  | Molecular weight | Theoretical pI | Formula                                                                               | Instability index (II) | Average Hydropathy |
|-----------------------|------------------|----------------|---------------------------------------------------------------------------------------|------------------------|--------------------|
| <i>MlpSTE3.3-URE</i>  | 43128.73         | 8.97           | C <sub>1981</sub> H <sub>3090</sub> N <sub>516</sub> O <sub>520</sub> S <sub>21</sub> | 36.83                  | 0.392              |
| <i>MlpSTE3.3-TEL</i>  | 43046.67         | 8.97           | C <sub>1974</sub> H <sub>3092</sub> N <sub>516</sub> O <sub>520</sub> S <sub>21</sub> | 37.09                  | 0.399              |
| <i>MmedSTE3.3-URE</i> | 43054.61         | 8.97           | C <sub>1974</sub> H <sub>3084</sub> N <sub>516</sub> O <sub>521</sub> S <sub>21</sub> | 36.05                  | 0.384              |
| <i>MmedSTE3.3-TEL</i> | 43185.78         | 8.97           | C <sub>1983</sub> H <sub>3093</sub> N <sub>517</sub> O <sub>521</sub> S <sub>21</sub> | 36.76                  | 0.397              |
| <i>MpruSTE3.3-URE</i> | 43135.58         | 8.78           | C <sub>1974</sub> H <sub>3067</sub> N <sub>515</sub> O <sub>524</sub> S <sub>23</sub> | 35.33                  | 0.363              |
| <i>MpruSTE3.3-TEL</i> | 43135.58         | 8.78           | C <sub>1974</sub> H <sub>3067</sub> N <sub>515</sub> O <sub>524</sub> S <sub>23</sub> | 35.33                  | 0.363              |
| <i>MlpSTE3.4-URE</i>  | 45766.19         | 8.86           | C <sub>2075</sub> H <sub>3223</sub> N <sub>549</sub> O <sub>571</sub> S <sub>24</sub> | 30.60                  | 0.282              |
| <i>MlpSTE3.4-TEL</i>  | 45766.19         | 8.86           | C <sub>2075</sub> H <sub>3223</sub> N <sub>549</sub> O <sub>571</sub> S <sub>24</sub> | 30.60                  | 0.282              |
| <i>MmedSTE3.4-URE</i> | 45766.19         | 8.86           | C <sub>2075</sub> H <sub>3223</sub> N <sub>549</sub> O <sub>571</sub> S <sub>24</sub> | 30.60                  | 0.282              |
| <i>MmedSTE3.4-TEL</i> | 45814.28         | 8.93           | C <sub>2080</sub> H <sub>3227</sub> N <sub>549</sub> O <sub>570</sub> S <sub>24</sub> | 31.17                  | 0.288              |
| <i>MpruSTE3.4-URE</i> | 44985.61         | 8.96           | C <sub>2063</sub> H <sub>3199</sub> N <sub>535</sub> O <sub>551</sub> S <sub>21</sub> | 37.62                  | 0.325              |
| <i>MpruSTE3.4-TEL</i> | 44989.60         | 8.96           | C <sub>2062</sub> H <sub>3199</sub> N <sub>535</sub> O <sub>552</sub> S <sub>21</sub> | 36.39                  | 0.326              |
| <i>MmagSTE3.4-URE</i> | 45085.68         | 8.96           | C <sub>2070</sub> H <sub>3199</sub> N <sub>535</sub> O <sub>552</sub> S <sub>21</sub> | 35.18                  | 0.325              |
| <i>MmagSTE3.4-TEL</i> | 45051.71         | 9.03           | C <sub>2068</sub> H <sub>3205</sub> N <sub>535</sub> O <sub>551</sub> S <sub>21</sub> | 35.70                  | 0.335              |

**Table S3. Hydrophilicity, hydrophobicity and transmembrane structure of STE3.3 and STE3.4 proteins in *Melampsora* spp.**

| Sequences             | Hydrophobicity peak              | Hydrophilicity peak                | Transmembrane helix | Number of helical amino acids in membrane | Probability of N-terminal on one side of plasma membrane |
|-----------------------|----------------------------------|------------------------------------|---------------------|-------------------------------------------|----------------------------------------------------------|
| <i>MlpSTE3.3-URE</i>  |                                  |                                    | 7                   | 153.85225                                 | 9.31%                                                    |
| <i>MlpSTE3.3-TEL</i>  | Position:130<br>Score:2.800(max) | Position:252 Score:-<br>2.400(min) | 7                   | 153.85564                                 | 9.31%                                                    |
| <i>MmedSTE3.3-URE</i> |                                  |                                    | 7                   | 153.85235                                 | 9.31%                                                    |
| <i>MmedSTE3.3-TEL</i> | Position:131<br>Score:2.800(max) | Position:253 Score:-<br>2.400(min) | 7                   | 154.47249                                 | 7.65%                                                    |
| <i>MpruSTE3.3-URE</i> | Position:130                     | Position:252 Score:-               | 7                   | 153.82699                                 | 11.18%                                                   |
| <i>MpruSTE3.3-TEL</i> | Score:2.800(max)                 | 2.400(min)                         | 7                   | 153.82699                                 | 11.18%                                                   |
| <i>MlpSTE3.4-URE</i>  |                                  |                                    | 6                   | 135.50797                                 | 84.80%                                                   |
| <i>MlpSTE3.4-TEL</i>  | Position:281                     | Position:386 Score:-               | 6                   | 135.50797                                 | 84.80%                                                   |
| <i>MmedSTE3.4-URE</i> | Score:2.989(max)                 | 2.300(min)                         | 6                   | 135.50797                                 | 84.80%                                                   |
| <i>MmedSTE3.4-TEL</i> |                                  |                                    | 6                   | 134.85116                                 | 87.83%                                                   |
| <i>MpruSTE3.4-URE</i> |                                  |                                    | 6                   | 140.20469                                 | 70.39%                                                   |
| <i>MpruSTE3.4-TEL</i> | Position:281                     | Position:108 Score:-               | 6                   | 141.6942                                  | 62.59%                                                   |
| <i>MmagSTE3.4-URE</i> | Score:3.333(max)                 | 2.544(min)                         | 6                   | 141.71101                                 | 62.59%                                                   |
| <i>MmagSTE3.4-TEL</i> |                                  |                                    | 6                   | 141.68069                                 | 62.59%                                                   |

**Table S4. Subcellular localization analysis of STE3.3 and STE3.4 protein in *Melampsora* spp.**

| Sequences             | Endoplasmic reticulum | Mitochondria | acuole | Cytoplasm | Nucleus | Vesicles | Golgi apparatus |
|-----------------------|-----------------------|--------------|--------|-----------|---------|----------|-----------------|
| <i>MlpSTE3.3-URE</i>  | 66.7%                 | 33.3%        | /      | /         | /       | /        | /               |
| <i>MlpSTE3.3-TEL</i>  | 66.7%                 | 33.3%        | /      | /         | /       | /        | /               |
| <i>MmedSTE3.3-URE</i> | 66.7%                 | 33.3%        | /      | /         | /       | /        | /               |
| <i>MmedSTE3.3-TEL</i> | 66.7%                 | 33.3%        | /      | /         | /       | /        | /               |
| <i>MpruSTE3.3-URE</i> | 66.7%                 | 33.3%        | /      | /         | /       | /        | /               |
| <i>MpruSTE3.3-TEL</i> | 66.7%                 | 33.3%        | /      | /         | /       | /        | /               |
| <i>MlpSTE3.4-URE</i>  | 33.3%                 | 11.1%        | 11.1%  | 11.1%     | 11.1%   | 11.1%    | 11.1%           |
| <i>MlpSTE3.4-TEL</i>  | 33.3%                 | 11.1%        | 11.1%  | 11.1%     | 11.1%   | 11.1%    | 11.1%           |
| <i>MmedSTE3.4-URE</i> | 33.3%                 | 11.1%        | 11.1%  | 11.1%     | 11.1%   | 11.1%    | 11.1%           |
| <i>MmedSTE3.4-TEL</i> | 33.3%                 | 11.1%        | 11.1%  | 11.1%     | 11.1%   | 11.1%    | 11.1%           |
| <i>MpruSTE3.4-URE</i> | 77.8%                 | 22.2%        | /      | /         | /       | /        | /               |
| <i>MpruSTE3.4-TEL</i> | 66.7%                 | 22.2%        | /      | /         | 11.1%   | /        | /               |
| <i>MmagSTE3.4-URE</i> | 66.7%                 | 22.2%        | /      | /         | 11.1%   | /        | /               |
| <i>MmagSTE3.4-TEL</i> | 66.7%                 | 22.2%        | /      | /         | 11.1%   | /        | /               |

Note: “/” indicates that it does not exist.

**Table S5. Signal peptide of STE3.3 and STE3.4 protein in *Melampsora* spp.**

| Sequences             | Division value D | Signal peptide sequence |
|-----------------------|------------------|-------------------------|
| <i>MlpSTE3.3-URE</i>  | 0.578            | 1-26                    |
| <i>MlpSTE3.3-TEL</i>  | 0.578            | 1-26                    |
| <i>MmedSTE3.3-URE</i> | 0.578            | 1-26                    |
| <i>MmedSTE3.3-TEL</i> | 0.578            | 1-26                    |
| <i>MpruSTE3.3-URE</i> | 0.584            | 1-18                    |
| <i>MpruSTE3.3-TEL</i> | 0.584            | 1-18                    |
| <i>MlpSTE3.4-URE</i>  | 0.509            | 1-17                    |
| <i>MlpSTE3.4-TEL</i>  | 0.509            | 1-17                    |
| <i>MmedSTE3.4-URE</i> | 0.509            | 1-17                    |
| <i>MmedSTE3.4-TEL</i> | 0.509            | 1-17                    |
| <i>MpruSTE3.4-URE</i> | 0.516            | 1-17                    |
| <i>MpruSTE3.4-TEL</i> | 0.516            | 1-17                    |
| <i>MmagSTE3.4-URE</i> | 0.516            | 1-17                    |
| <i>MmagSTE3.4-TEL</i> | 0.516            | 1-17                    |

## Supplemental Figures

**Figure S1.** The tertiary structure of STE3.3 and STE3.4 protein based on Mlp

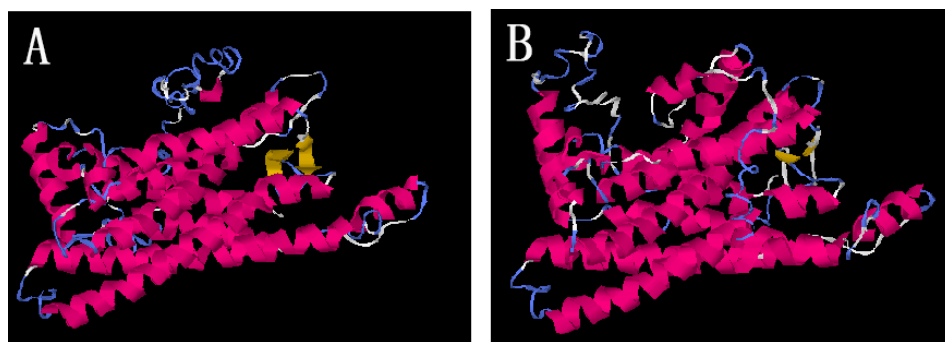

**Figure S2.** Nuclei of basidiospore under fluorescence microscopy

Note: A-C, Mlp; D-F, Mmed; A&D, Germinated teliospore; B&F, Probasidium; C&F, Basdiospora

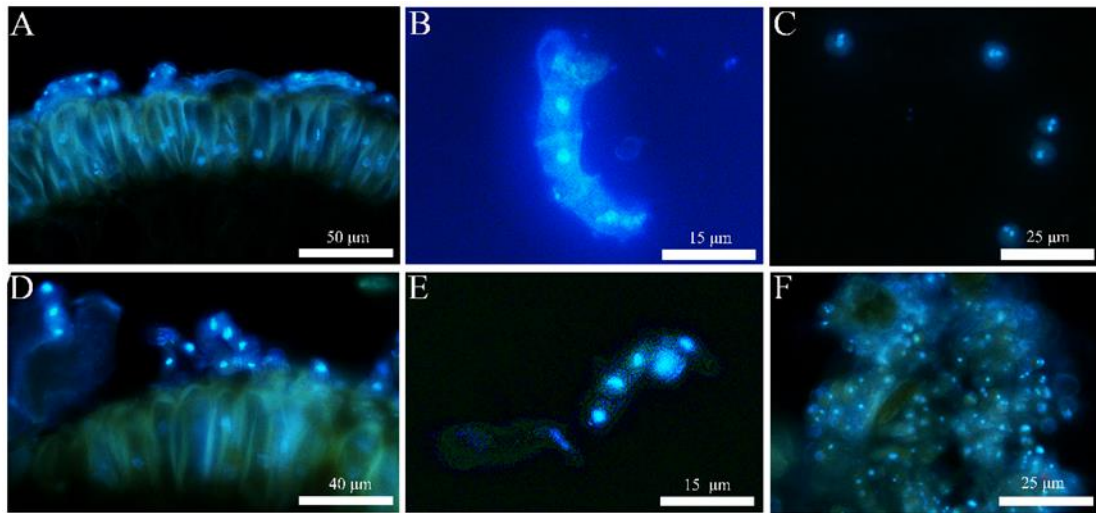

**Figure S3.** Morphological characteristics of pycnia and aecia observed by transmission electron microscope (TEM)

Note: A, Ontogeny of aecia, the below under the line is monokaryotic, but the above is dikaryotic; B, Dicaryotization by cell membrane fusion

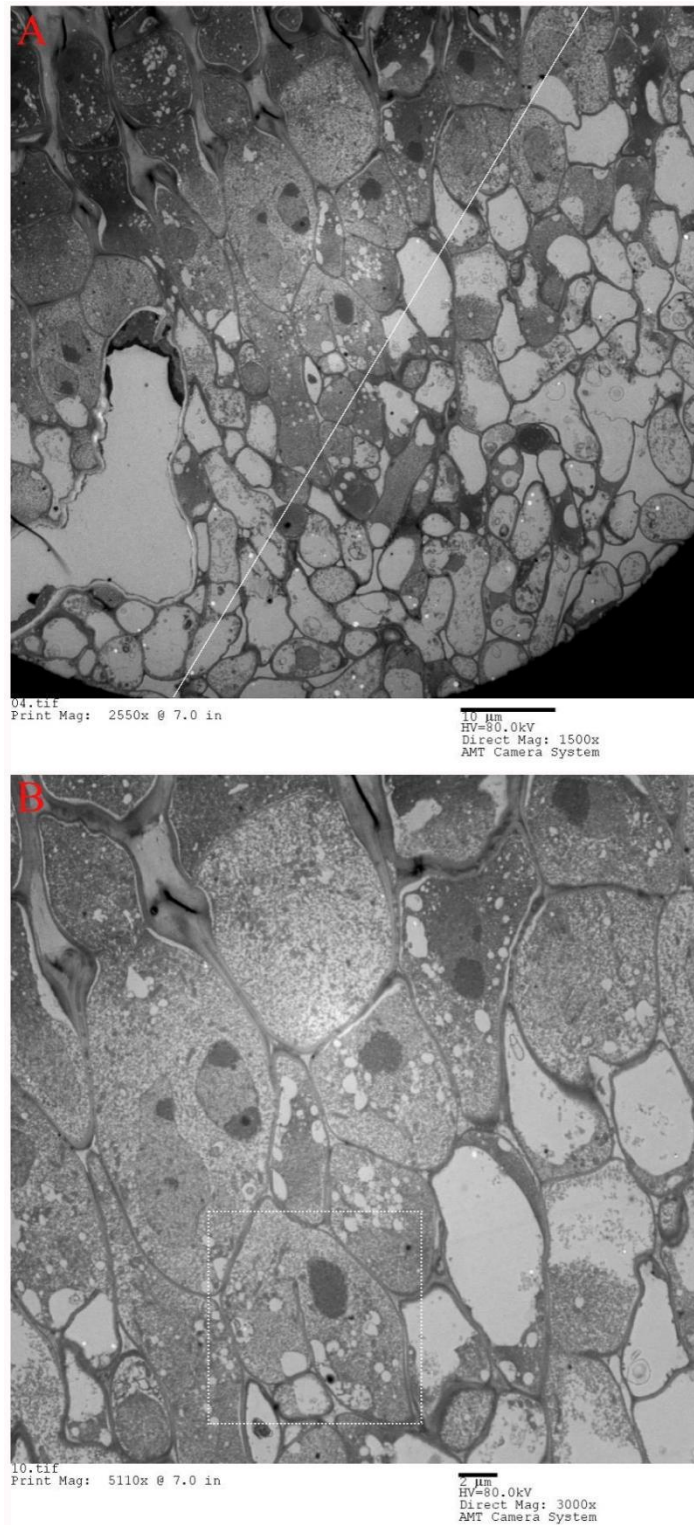



**Figure S4.** Buds of poplar collected in this study

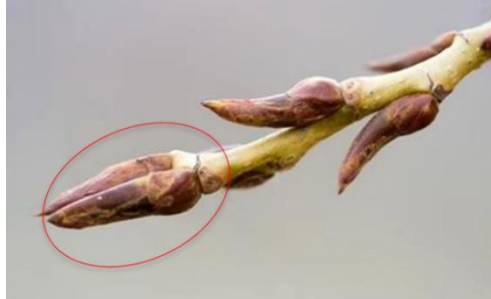

Supplement: s1 [file s1]
